# Supplementary material
Source: PubMed Central journal article supplement (PMC5261616)

**Online Figure:** Areas of uncertainty surrounding the optimal cell-based therapy for cardiac regeneration

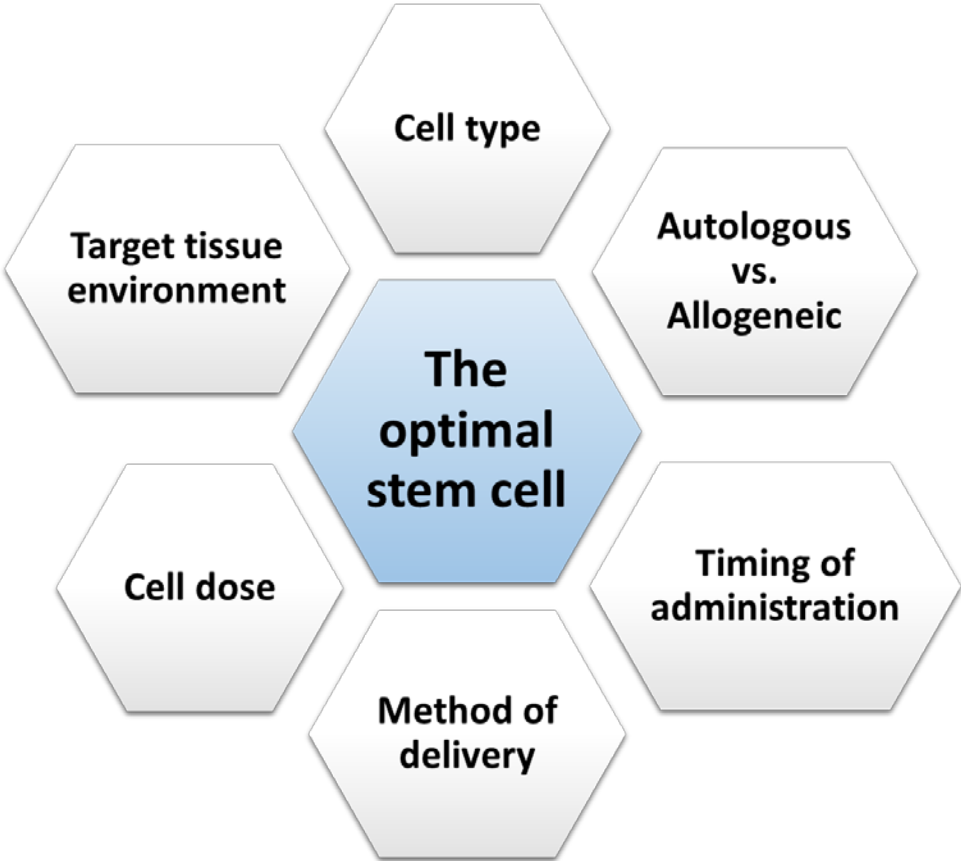

Supplement: NIHMS838899-supplement-Supplemental_Figure.pdf [file NIHMS838899-supplement-Supplemental_Figure.pdf]
